## **Title:** Predicting Mobile Health Clinic Utilization for COVID-19 Vaccination in South Carolina: A Statistical Framework for Strategic Resource Allocation

Fatih Gezer<sup>a,b,\*</sup>, PhD, MS, Kerry A. Howard<sup>a,b</sup>, PhD, MS, Kevin J. Bennett<sup>c,d,e</sup>, PhD, Alain H. Litwin<sup>d,e,f</sup>, MD, MPH, Kerry K. Sease<sup>i</sup>, MD, MPH, Lior Rennert<sup>a,b,\*</sup>, PhD

<sup>a</sup> Department of Public Health Sciences, Clemson University, Clemson, South Carolina, USA

<sup>b</sup> Center for Public Health Modeling and Response, Clemson University, Clemson, South Carolina, USA

<sup>c</sup> University of South Carolina School of Medicine – Columbia, Columbia, SC, USA

<sup>d</sup> South Carolina Center for Rural & Primary Healthcare, Columbia, SC, USA

<sup>e</sup> Research Center for Transforming Health, Columbia, SC, USA

<sup>f</sup> Prisma Health-Upstate, Greenville, South Carolina, USA

<sup>g</sup> Clemson University School of Health Research, Clemson University, Clemson, South Carolina, USA

<sup>h</sup> University of South Carolina School of Medicine – Greenville, Greenville, SC, USA

<sup>i</sup> Institute for the Advancement of Community Health, Furman University, Greenville, SC, USA

### **\* Corresponding authors:**

Lior Rennert, PhD

Department of Public Health Sciences, Clemson University

517 Edwards Hall

Clemson, SC, 29601

864-656-7434

liorr@clemson.edu

Fatih Gezer, PhD

Department of Public Health Sciences, Clemson University

526 Edwards Hall

Clemson, SC, 29601

864-656- 5865

fgezer@clemson.edu

**Declaration of interests:** This study was funded by the National Library of Medicine of the National Institutes of Health and the Center for Forecasting and Outbreak Analytics of the Centers for Disease Control and Prevention. The MHC program was supported by The Greenville County CARES Program as part of a COVID-19 Funding Program. LR, KJB, AHL, and KKS received support from the National Library of Medicine of the National Institutes of Health (R01LM014193) during this study; LR, FG, KAH, KJB, AHL, and KKS received support from the Centers for Disease Control and Prevention (NU38FT000011) during this study. The funders had no role in the design, conduct, reporting of the study, or decision to submit for publication. Authors declare no competing financial, personal, or professional interests that could be construed to have influenced the work.

1 **Abstract**

2 **Background:** Mobile health clinics (MHCs) are effective tools for providing health services to  
3 disadvantaged populations, especially during health emergencies. However, patient utilization of  
4 MHC services varies substantially. Strategies to increase utilization are therefore needed to  
5 maximize the effectiveness of MHC services by serving more patients in need. The purpose of  
6 this study is to develop a statistical framework to identify and prioritize high-risk communities  
7 for delivery of MHCs during health emergencies.

8 **Methods:** Prisma Health MHCs delivered COVID-19 vaccines to communities throughout South  
9 Carolina between February 20, 2021, and February 17, 2022. In this retrospective study, we use  
10 generalized linear mixed effects model and ordinal logistic regression model to identify factors  
11 associated with, and predict, MHC utilization for COVID-19 vaccination by census tract.

12 **Results:** The MHCs conducted 260 visits to 149 sites and 107 census tracts. The site-level  
13 analysis showed that visits to schools (RR=2.17, 95% CI=1.47-3.21), weekend visits (RR=1.38,  
14 95% CI=1.03-1.83), and visits when the resources were limited (term 1: 7.11, 95% CI=4.43-  
15 11.43) and (term 2: 2.40, 95% CI=1.76-3.26) were associated with greater MHC utilization for  
16 COVID-19 vaccination. MHC placement near existing vaccination centers (RR=0.79, 95%  
17 CI=0.68-0.93) and hospitals (RR=0.83, 95% CI=0.71-0.96) decreased utilization. Predictive  
18 models identified 1,227 (94.7%) census tracts with more than 250 individuals per MHC visit  
19 when vaccine resources were limited. Predictions showed satisfactory accuracy (72.6%). The  
20 census tracts with potential of high MHC demand had higher adolescent, 30-44 years old, non-  
21 White populations, lower Primary Care Practitioners per 1,000 residents, fewer hospitals, and  
22 higher cumulative COVID-19 emergency department visits and deaths (compared to census

23 tracts in the low MHC demand category). After the vaccines became widely available, the  
24 demand at MHCs declined.

25 **Conclusion:** These study findings can be used to improve MHC allocation by identifying and  
26 prioritizing medically underserved communities for strategic delivery of these limited resources.

27

28

29

30

31

32

33

34

35

36

37

38

39

40

41

## 42 **Introduction**

43           The COVID-19 pandemic has affected the lives of millions worldwide, including nearly  
44 1.2 million deaths in the United States (US).[1] The pandemic has also exacerbated inequalities  
45 in health outcomes, compounded with ethnic minority groups and rural communities  
46 experiencing less access for testing, vaccination, and treatment services, and greater death  
47 rates.[2–8] These consequences underscored the need for strategies to reach vulnerable  
48 communities more effectively.[9,10] Mobile health clinics (MHCs) deliver quality healthcare  
49 services to medically underserved communities who lack access to healthcare resources and  
50 facilities, especially during health emergencies.[11–14] MHCs were used during the COVID-19  
51 pandemic for vaccination in the U.S. and different countries,[15–19] and mainly benefitted by  
52 rural communities and medically underserved populations.[11,12,20,21]

53           However, the inability to effectively identify and prioritize high-risk communities has  
54 posed daunting challenges for decision makers and has led to less-than-optimal allocation  
55 strategies. This is especially problematic during phases of pandemics when resources are limited,  
56 as these phases correlate with periods of high transmission, morbidity, and mortality.[22–24]  
57 Less efficient allocation strategies have a disproportionate impact on medically underserved  
58 communities. For example, age-based allocation of COVID-19 vaccines adopted by states  
59 nationwide lead to inequity in vaccination uptake, with lower rates in economically  
60 disadvantaged neighborhoods that were at an increased risk for severe SARS-CoV-2 infection  
61 and death.[25–27] Alternatively, one study showed that the inclusion of geographic region into  
62 the prioritization process would have led to an estimated 18% decrease in COVID-19 related  
63 hospitalizations.[25]

64 Data-driven approaches can improve emergency planning and overall health outcomes by  
65 guiding timely delivery of essential resources to high-risk communities.[28–31] One study  
66 showed that prioritization of COVID-19 testing to high-risk areas is twice as likely to detect  
67 positive cases compared to random allocation of tests (e.g., based on population sized).[32]  
68 Moreover, utilization of MHC services can substantially vary by site location.[33,34] Site visits  
69 with low utilization are a missed opportunity to provide health care to individuals in need, and  
70 drastically reduce the potential impact of MHC services. Therefore, projecting low- and high-  
71 demand areas at granular geographic levels can assist in optimizing the effectiveness of MHC  
72 services.[35]

73 Various studies investigated the characteristics of individuals who used MHCs and  
74 community-level factors associated with MHC utilization.[36,37] Individuals who utilized the  
75 MHCs tend to be mostly ethnic minorities and uninsured persons.[34,38] MHCs had a higher  
76 uptake when they were located at places where the proportions of uninsured and non-white  
77 populations were higher, and primary care practitioner rates were lower.[34] Several studies built  
78 predictive models for COVID-19 vaccine uptake using structural equation models, machine  
79 learning-based approaches, and conceptual models.[39–42] However, these studies were  
80 conducted based on data for general populations rather than MHC users hence they did not target  
81 medically underserved populations. For such populations, geographic granularity is needed to  
82 effectively inform public health interventions, including MHCs.

83 In this retrospective study, we develop predictive models to predict MHC utilization for  
84 COVID-19 vaccination in South Carolina (SC) during different phases of the pandemic. The  
85 projection of MHC utilization allows us to signify the low- and high-demand census tracts for  
86 MHC utilization and understand their characteristic differences. We also explore MHC logistical

87 factors and community determinants that contribute to greater utilization after the high-demand  
88 regions are detected, ultimately aiming to inform policy, improve public health outcomes, and  
89 optimally allocate MHCs for greater utilization.

## 90 **Methods**

### 91 *Setting*

92 Prisma Health is a SC-based healthcare organization that serves 1.2 million patients per  
93 year.[43] Prisma Health deployed MHCs to increase COVID-19 vaccination in underserved  
94 communities between February 20, 2021, and February 17, 2022. A detailed explanation of  
95 Prisma Health's MHC activities for COVID-19 vaccination program is provided in the  
96 literature.[34]

### 97 *Variables*

98 Data obtained from MHC visits included the name, time, date, and location of the visit  
99 site, site type, duration of the visit, and the number of individuals who received COVID-19  
100 vaccines. Site types include churches; public K-12 schools; universities; corporate locations such  
101 as business centers, homeless shelters; and other kinds of places such as community and wellness  
102 centers, supermarkets, and parks. Based on the data, we categorized the timing of the week  
103 (Monday to Thursday, Friday, or Weekend), determined time of the day (morning: before 12 pm,  
104 afternoon: from 12 to 4 pm, and evening: after 4 pm), visit number (first, second, and third or  
105 more), and zip code and census tract code of the visited sites.

106 The community-level variables included census tract and zip code level demographic,  
107 socioeconomic, and health-related factors. Age, sex, race, ethnicity, median income,  
108 unemployment rate, labor force participation, and social vulnerability index (SVI) variables were

109 at the census tract level and linked to census tracts of the MHC site locations. These  
110 demographic and socioeconomic variables were obtained from the United States Census Bureau  
111 American Community Survey for 2021.[44] SVI is a measure that assesses the resilience of  
112 communities when faced with external stresses and is developed by the Agency for Toxic  
113 Substances and Disease Registry (ATSDR) at the Centers for Disease Control and Prevention  
114 (CDC).[45] The four components of SVI are socioeconomic status, household composition and  
115 disability, minority status and language, and housing and transportation.[46] Data related to  
116 health care access were obtained from The South Carolina Center for Rural and Primary  
117 Healthcare (SCCRPH) and is available at the zip code level.[47] These variables included the  
118 number of hospitals, primary care physicians (PCP) per 1000 residents, all-cause mortality rate  
119 per 1000 residents, the percentage of uninsured individuals in each zip code, and the percentage  
120 of rural areas in each zip code is provided. We also included the number of vaccination centers  
121 within a 2-mile radius and the number of hospitals within a 3-mile radius of each MHC  
122 location.[48,49] Data for emergency department (ED) COVID-19 hospitalizations and deaths  
123 were obtained from the South Carolina Revenue and Fiscal Affairs Office.[50]

#### 124 *Statistical analysis*

125 We used negative binomial generalized linear mixed effects models to assess the  
126 relationship between site-related factors and MHC utilization for COVID-19 vaccination. For  
127 the projection of MHC utilization, we aimed a ranking based approach of possible MHC  
128 utilization at census tract level. Therefore, we used ordinal logistic regression models for the  
129 ordered categorical outcome of the MHC utilization using demographic, socioeconomic, and  
130 health-related predictors. Details about the model descriptions are provided in the Supplementary  
131 Material.

132           The ordinal grouping of the MHC utilization consisted of number of individuals within 0-  
133 19, 20-49, 50-99, 100-249, 250-399, and more than 400. These groupings were used both for the  
134 validation of the models built on available MHC data, and for the projection of MHC utilization  
135 for the remaining census tracts in SC. The validation stage is performed by randomly sampling  
136 training and validation sets from the entire MHC data available for 106 census tracts. The  
137 validation set included 25 randomly sampled census tracts and the remaining data is used for the  
138 training of the models. Once the models are trained, we predicted the MHC utilization in 25  
139 census tracts and compared it with the truth. If the predicted category is correctly predicted, we  
140 noted is as exact category prediction. However, if the predicted category was different than the  
141 truth, we noted the degree of deviation by checking how many categories the prediction was  
142 away from the truth, for instance, one group higher than truth or two groups lower than truth. We  
143 repeated the random sampling of 25 census tracts for 1,000 times independently, hence we  
144 approximated the accuracy of the prediction performance. For the variables available at the  
145 ZCTA level, we partitioned the data into census tracts linked to that ZCTA weighting on the  
146 census tract population.

147           Due to significant changes in vaccine eligibility and availability, we stratify the study  
148 period before and after March 31, 2021. There were significant policy changes on or near these  
149 dates regarding the targeted groups for vaccination in the US. For instance, individuals aged 16  
150 or older become eligible for COVID-19 vaccination on March 31. At the same time, COVID-19  
151 vaccines became more widely available at pharmacies, clinics, and other health-providing  
152 organizations.[51] As a sensitivity analysis, we also stratify the time period before and after May  
153 10, 2021, which is the date adolescents aged 12 to 15 were eligible for COVID-19  
154 vaccination.[52]



## 155 **Results**

### 156 *Descriptive summaries*

157           Between February 20, 2021, and February 17, 2022, the Prisma Health MHCs had 260  
158 visits to 149 locations in SC. These visits took place in 59 zip codes (of 424 zip codes) and 107  
159 census tracts (of 1,323 census tracts), and the MHC delivered 12,102 vaccines to 8,545  
160 individuals. Descriptive statistics for the individuals and site types have been provided in  
161 previous research.[34] The vaccine uptake at each site visit over one-year period is shown in  
162 Figure 1. Box plots are generated based on the site visits in each month represented by the red  
163 points. MHCs had higher demand per visit before March 31, 2021, when the vaccination  
164 resources were limited and there were restrictions on certain age groups. After this date, although  
165 the MHCs increased the frequency of its activities, utilization of MHCs per visit decreased.  
166 There was an exception of a school site with visits that occurred in July and August 2021 in  
167 which the MHC exceeded 600 vaccinations on both dates.

168           Vaccine uptake based on the site type and the day and time of the visit for different  
169 vaccination terms (first term: before March 31, 2021, second term: between April 1 and May 9 of  
170 2021, and third term: after May 10, 2021) are summarized in Figure 2. The majority of the MHC  
171 events in the first term took place on weekends and mornings at churches, schools, and  
172 universities. Although MHCs started visits on different days and times in the second and third  
173 terms, overall MHC utilization per visit was not high especially on the third term. Considering  
174 all terms, church visits mainly occurred on weekend mornings, and school and corporate visits  
175 Monday to Thursday afternoons.

176

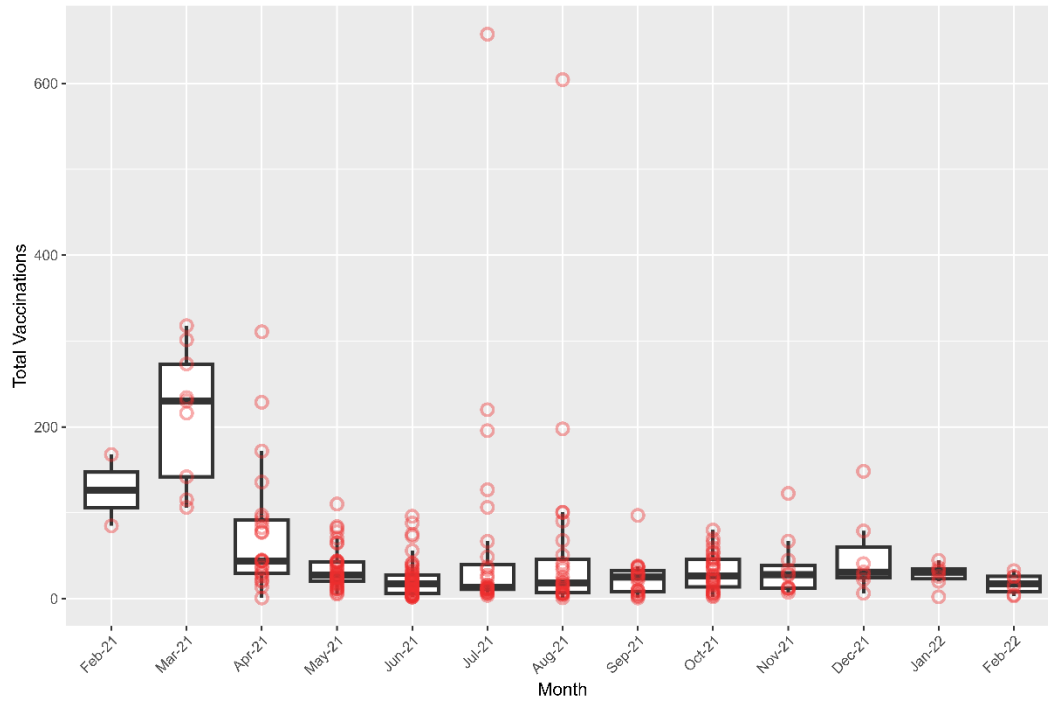

177

178 Figure 1. Boxplot of vaccination counts at site visits per month between February 20, 2021, and  
179 February 17, 2022. Points show the number of vaccinated individuals at each site visit for  
180 different months and constitute the box plot.

181

182

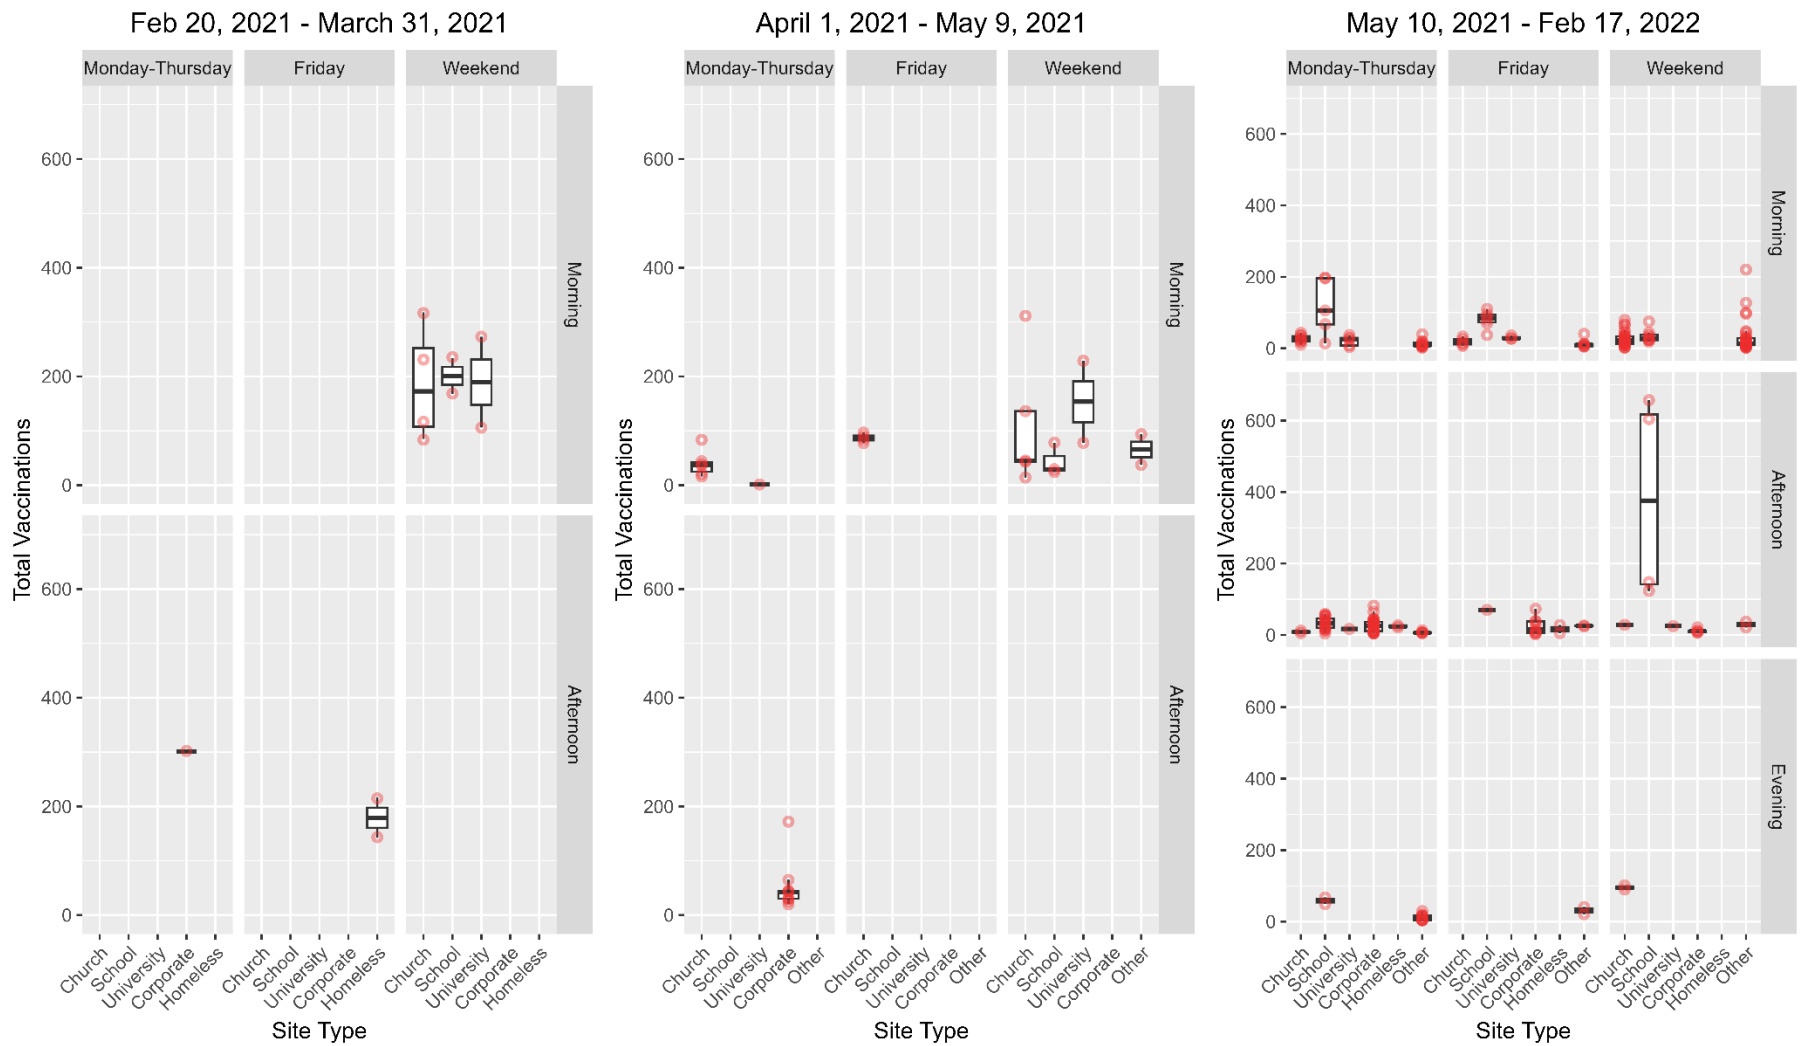

183

184 Figure 2. Boxplot of vaccination counts based on different terms (before March 31, 2021, between April 1 and May 9 of 2021, and  
 185 after May 10, 2021), site types, the day of the week, and the time of the day.

186 ***Site-related factors associated with MHC utilization***

187 The site-related factors associated with MHC utilization are shown in Table 1. Estimated  
 188 relative risk (RR) with 95% confidence intervals (CI) represents the relative change in the MHC  
 189 utilization with respect to a standard deviation increase in the continuous predictor variables, and  
 190 a category change in the categorical variables. School visits and visits on Weekends, and visits  
 191 within the first term (between February 20, 2021, and March 31, 2021) and second term  
 192 (between April 1, 2021 and February 17, 2022) were associated with higher MHC utilization.  
 193 Also, MHCs gained greater utilization at their second visits to a certain site. Having nearby  
 194 vaccination centers and hospitals, and other types of site visits than schools, churches, corporate  
 195 locations and homeless shelters decreased MHC utilization.

196 Table 1: Results for negative binomial models that are adjusted for vaccination term, site type,  
 197 day of the week, time of the day, visit number, visit duration, and population.

|                                                 | <b>RR</b> | <b>CI</b>      | <b>P-value</b>   |
|-------------------------------------------------|-----------|----------------|------------------|
| <b>Vaccination Term (Ref: Third term)</b>       |           |                |                  |
| First Term                                      | 7.11      | (4.43 - 11.43) | <b>&lt;0.001</b> |
| Second Term                                     | 2.40      | (1.76 - 3.26)  | <b>&lt;0.001</b> |
| <b>Site type (Ref: Church)</b>                  |           |                |                  |
| School                                          | 2.17      | (1.47 - 3.21)  | <b>&lt;0.001</b> |
| University                                      | 1.22      | (0.68 - 2.17)  | 0.509            |
| Corporate                                       | 1.19      | (0.71 - 1.99)  | 0.520            |
| Homeless                                        | 1.17      | (0.49 - 2.80)  | 0.731            |
| Other                                           | 0.68      | (0.48 - 0.97)  | <b>0.033</b>     |
| <b>Day of the week (Ref: Monday – Thursday)</b> |           |                |                  |
| Friday                                          | 1.32      | (0.97 - 1.81)  | 0.079            |
| Weekend                                         | 1.38      | (1.03 - 1.83)  | <b>0.029</b>     |
| <b>Time of the day (Ref: Morning)</b>           |           |                |                  |
| Afternoon                                       | 1.17      | (0.78 - 1.74)  | 0.449            |
| Evening                                         | 1.44      | (0.84 - 2.47)  | 0.184            |
| <b>Visit number (Ref: First visit)</b>          |           |                |                  |
| Second                                          | 1.21      | (1.01 - 1.45)  | <b>0.036</b>     |
| Third or more                                   | 0.96      | (0.75 - 1.25)  | 0.778            |

|                                      | <b>RR</b> | <b>CI</b>     | <b>P-value</b> |
|--------------------------------------|-----------|---------------|----------------|
| Visit duration                       | 1.00      | (0.89 - 1.12) | 0.993          |
| Population                           | 1.06      | (0.92 - 1.22) | 0.429          |
| Number of nearby vaccination centers | 0.79      | (0.68 - 0.93) | <b>0.003</b>   |
| Number of nearby hospitals           | 0.83      | (0.71 - 0.96) | <b>0.015</b>   |

198

199

### 200 *Model Validation*

201 The agreement between the predicted and actual category of MHC utilization is  
 202 summarized in Table 2 using term-based models (term 1: before March 31, 2021, term 2: after  
 203 April 1, 2021). Overall, 72.6% of model predictions were within +/- 1 of the true vaccine uptake  
 204 group as described in the methods. The models predicted the exact category of the outcome in  
 205 30.5% of the validation observations, and they predicted one group either a higher or lower  
 206 category than the actual category for 42.1% of the validation observations.

207 Table 2: Results for prediction accuracy. Number of census tracts that have the same and  
 208 deviated observed and predicted category for term-based predictions (term 1: before March 31,  
 209 2021, term 2: after April 1, 2021).

| <b>Predicted Category</b>        | <b>Term-based Predictions<br/>N (%)</b> |
|----------------------------------|-----------------------------------------|
| 5 groups higher than truth       | -                                       |
| 4 groups higher than truth       | -                                       |
| 3 groups higher than truth       | 197 (0.8)                               |
| 2 groups higher than truth       | 2,598 (10.4)                            |
| <b>1 group higher than truth</b> | <b>5,394 (21.6)</b>                     |
| <b>Exact group</b>               | <b>7,635 (30.5)</b>                     |
| <b>1 group lower than truth</b>  | <b>5,136 (20.5)</b>                     |
| 2 group lower than truth         | 2,974 (11.9)                            |
| 3 group lower than truth         | 926 (3.7)                               |
| 4 group lower than truth         | 140 (0.6)                               |
| 5 group lower than truth         | -                                       |

210

211

## 212 *Vaccine projections for census tracts*

213 We projected the MHC utilization for all census tracts of SC. These models use the  
214 characteristics of census tracts that MHCs visited as the predictors and projected the ordinal  
215 category of MHC utilization in other census tracts. The projections are performed prior and post  
216 March 31, 2021. The number of census tracts in each category of predicted MHC utilization is  
217 shown in Table 3 for both cases. Projected MHC utilization per visit prior to March 31, 2021,  
218 was substantially higher at most census tracts (Figure 3). Results for 12-months and for cutoff  
219 term of May 10, 2021, are provided in Figure S1 in the Supplementary Material. There were 32  
220 (2.5%) census tracts that were projected to receive more than 400 visitors at a single MHC visit,  
221 and 1,195 (92.2%) census tracts projected to receive relatively high utilization with 250 to 399  
222 individuals, whereas only 69 (5.3%) census tracts were estimated to be utilized by under 249  
223 individuals. On the other hand, the models predicted overall low MHC utilization starting from  
224 April 1, 2021, where only 181 (14.0%) census tracts would receive between 50 and 99  
225 individuals, and 86.1% of census tracts would have low utilization.

226 Census tracts categorized in the highest and lowest MHC utilization categories had  
227 substantial differences in some of their community-level characteristics (Table 4). Compared to  
228 the low MHC utilization category, the highest category census tracts had a higher proportion of  
229 individuals under 18 years of age and 30-44 age group, a higher proportion of non-White and  
230 Hispanic individuals. More importantly, these census tracts had lower PCP rates, lower number  
231 of hospitals, higher cumulative COVID-19 ED visits and deaths prior to MHCs were deployed  
232 on February 20, 2021. Sensitivity analyses for the cutoff date of May 10, 2021, and for 12-month  
233 term are also performed, and the results are provided Tables S2-S6, respectively.

234 Table 3: Number of census tracts (N) for each category of the projected MHC utilization.  
 235 Projections are made for an MHC visit at any time before March 31, 2021, and after April 1,  
 236 2021.

| Grouping | Before        | After         |
|----------|---------------|---------------|
|          | March 31      | April 1       |
|          | N = 1,296 (%) | N = 1,296 (%) |
| 0-19     | -             | 973 (75.0)    |
| 20-49    | -             | 142 (11.0)    |
| 50-99    | 4 (0.3)       | 181 (14.0)    |
| 100-249  | 65 (5.0)      | -             |
| 250-399  | 1,195 (92.2)  | -             |
| 400+     | 32 (2.5)      | -             |

237

238

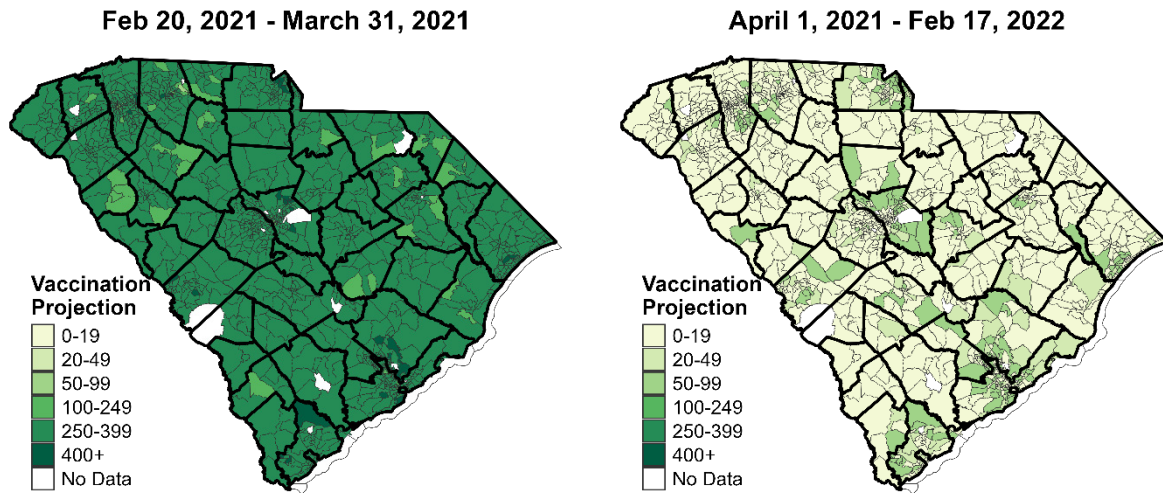

239

240 Figure 3: Projected MHC utilization for COVID-19 vaccination at census tracts at different time  
 241 periods (pre and post March 31, 2021).

242

243

244

245

246

247

248

249

250

251

252

253 Table 4: Characteristics of census tracts that are projected to have high (groups: 250-399 and  
 254 400+) and low (groups: 50-99 and 100-249) MHC utilization for COVID-19 vaccination before  
 255 March 31, 2021. Median values with IQR and p-values for significance of the difference of  
 256 medians are provided.

|                    | <b>High Utilization</b> | <b>Low Utilization</b> |                  |
|--------------------|-------------------------|------------------------|------------------|
|                    | <b>N = 1,227</b>        | <b>N = 69</b>          | <b>P-value</b>   |
| % Age under 18     | 21.6 (18.0-25.1)        | 20.1 (13.9-23.4)       | 0.044            |
| % Age 18-29        | 14.1 (11.0-17.5)        | 16.3 (12.6-34.7)       | <b>0.001</b>     |
| % Age 30-44        | 18.3 (15.0-21.5)        | 16.2 (11.5-19.7)       | <b>0.011</b>     |
| % Age 45-64        | 26.5 (23.0-29.9)        | 25.7 (16.9-31.0)       | 0.263            |
| % Age over 65      | 17.4 (13.4-21.8)        | 16.7 (11.9-21.7)       | 0.398            |
| % Male             | 48.5 (45.9-51.1)        | 49.8 (46.9-53.0)       | <b>0.030</b>     |
| % Non-white        | 35.6 (20.5-55.1)        | 25.8 (9.1-37.5)        | <b>0.009</b>     |
| % Hispanic         | 4.8 (2.8-7.9)           | 3.7 (2.7-5.9)          | <b>0.022</b>     |
| SVI                | 0.5 (0.3-0.8)           | 0.6 (0.3-0.8)          | 0.053            |
| Income (×\$1000)   | 55.3 (42.6-71.3)        | 46.9 (34.0-62.6)       | <b>0.007</b>     |
| % Unemployed       | 4.6 (2.6-7.6)           | 4.2 (2.6-6.9)          | <b>&lt;0.001</b> |
| PCP rate           | 0.3 (0.0-0.8)           | 3.9 (0.5-16.0)         | <b>&lt;0.001</b> |
| Hospitals          | 0.0 (0.0-1.0)           | 0.9 (0.2-1.5)          | <b>&lt;0.001</b> |
| % Uninsured        | 10.9 (8.8-12.3)         | 10.2 (7.7-11.6)        | 0.426            |
| Mortality rate     | 51.3 (40.7-60.7)        | 50.3 (38.3-60.3)       | 0.797            |
| % in Poverty       | 11.0 (7.1-15.7)         | 14.0 (10.2-17.3)       | <b>0.006</b>     |
| % in Rural         | 28.0 (5.0-60.0)         | 15.0 (0.2-62.4)        | 0.102            |
| COVID-19 ED visits | 1,189 (658-2,012)       | 846 (504-1,260)        | <b>0.002</b>     |
| COVID-19 deaths    | 64 (35-99)              | 41 (22-70)             | <b>0.002</b>     |

257

258

## 259 Discussion

260 This study aims to serve as a tool to improve the MHCs' activities by providing important  
 261 insights from the utilization of MHCs during COVID-19 vaccination across South Carolina,  
 262 highlighting the potential to optimize resource allocation by identifying high-uptake areas and  
 263 understanding the factors influencing MHCs' success. The findings underscore the importance of  
 264 strategically deploying MHCs to maximize vaccine reach, particularly among underserved and  
 265 vulnerable populations.



266           Operational factors including site type (e.g., church, school, etc.), day, and time of the  
267 week were significantly associated with vaccine uptake. Notably, visits to schools and visits  
268 conducted on weekends were linked to higher vaccine uptake. During the pre- and post-March  
269 31, 2021, 72.7% and 38.6% of MHC visits were conducted on weekends with median utilization  
270 of 199 (IQR: 112 - 243) and 23 (IQR: 10 – 38) per visit, respectively.[34] Although the school  
271 visits were similar for pre- and post-March 31, 2021 with 18.2% and 18.5%, the utilization per  
272 visit was 200 (IQR: 184 - 217) and 45 (IQR: 24 - 77) making highest utilized location for post-  
273 March 31, 2021 followed by universities 27 (IQR: 17 - 36). These findings suggest that MHCs  
274 can achieve a more significant impact by targeting educational institutions and scheduling visits  
275 on days and times that are more convenient for community members. Moreover, the presence of  
276 nearby vaccination centers and hospitals was found to negatively impact MHC utilization. This  
277 suggests that MHCs are particularly valuable in areas with limited access to fixed-site  
278 vaccination centers, highlighting the importance of strategic placement in underserved regions.

279           The predictive models identified 1,227 census tracts with higher potential for vaccine  
280 uptake, which had a higher rate of uninsurance and mortality, a higher proportion of ethnic  
281 minority populations and adolescents, and were in rural areas. These findings are consistent with  
282 MHC-centered studies conducted for other states and cities.[36–38] In this study, we found  
283 additional healthcare-related factors associated with MHC utility. Census tracts with lower rates  
284 of primary care practitioners, hospitals, and other vaccination sites had higher MHC utilization  
285 compared to the low-demand census tracts, highlighting the potential of MHC utilization at  
286 locations with limited healthcare resources and facilities. The role of predictive models is to act  
287 as a classifying or categorization mechanism that identifies areas and communities that are more  
288 likely to use the MHCs given the limited data from previous MHC visits. A possible setting for

289 MHC allocation could be to use the existing data and base on the categorical projection of new  
290 areas such as census tracts that MHC could possibly get high demand. As MHCs conduct visits  
291 to more places relying on the projected high-demand areas, the models can be validated and  
292 updated based on the new data. Hence this framework will allow an optimal deployment of  
293 MHCs to gain the highest utilization especially by ones who need these services the most.

294         The time component of projections for MHC utilization at the census tract level provides  
295 important decision-making implications for public health planning. Before March 31, 2021, the  
296 models predicted high MHC utilization in most census tracts, reflecting the high demand for  
297 vaccines during the initial rollout phase. However, after this date, the predicted utilization  
298 decreased significantly, indicating the need for continuous assessment and adaptation of MHC  
299 deployment strategies as the pandemic evolves and vaccine availability at other providers  
300 changes.

301         This study has several limitations. First, there were substantial changes in vaccine  
302 eligibility and availability which affected the MHC utilization. The retrospective design and  
303 reliance on limited data may not capture all relevant factors influencing MHC utilization. These  
304 factors may also differ from state to state. Future research should consider prospective studies  
305 and incorporate additional factors such as community engagement and outreach efforts to  
306 provide a more comprehensive understanding of MHC effectiveness. To extend the similar  
307 framework to other states, countries, and to different diseases, one needs to consider the  
308 determinants of the regions and the disease.

309         In conclusion, this study provides a framework for optimizing the deployment of MHCs  
310 in future health emergencies by identifying factors associated with higher vaccine uptake and  
311 predicting areas of high utilization. Predicting the highest- and lowest-demand census tracts for

312 MHC utilization provides categorized importance structure for public health planning and  
313 resource allocation. Strategic allocation of MHCs based on these insights can enhance the timely  
314 delivery of essential resources to the most vulnerable communities during health emergencies  
315 and ultimately save more lives.

316

317

318

319

320

321

322

323

324

325

326

327

328

329

330

331

332

333

334

335

336

337

338

## 339 **References**

- 340 1. CDC. Centers for Disease Control and Prevention. 2020 [cited 2023 Sep 14]. COVID Data  
341 Tracker. Available from: <https://covid.cdc.gov/covid-data-tracker>
- 342 2. Risk for COVID-19 infection, hospitalization, and death by race/ethnicity. [cited 2024 Jun  
343 28]; Available from: <https://stacks.cdc.gov/view/cdc/105453>
- 344 3. Henning-Smith C. The Unique Impact of COVID-19 on Older Adults in Rural Areas. *J*  
345 *Aging Soc Policy*. 2020;32(4–5):396–402.
- 346 4. Paul R, Arif A, Pokhrel K, Ghosh S. The Association of Social Determinants of Health With  
347 COVID-19 Mortality in Rural and Urban Counties. *J Rural Health*. 2021;37(2):278–86.
- 348 5. Overcoming Barriers to COVID-19 Vaccination in African Americans: The Need for Cultural  
349 Humility [Internet]. [cited 2024 Jun 28]. Available from:  
350 <https://ajph.aphapublications.org/doi/epub/10.2105/AJPH.2020.306135>
- 351 6. Lieberman-Cribbin W, Tuminello S, Flores RM, Taioli E. Disparities in COVID-19 Testing  
352 and Positivity in New York City. *Am J Prev Med*. 2020 Sep;59(3):326–32.
- 353 7. Press VG, Huisingh-Scheetz M, Arora VM. Inequities in Technology Contribute to  
354 Disparities in COVID-19 Vaccine Distribution. *JAMA Health Forum*. 2021 Mar  
355 19;2(3):e210264.
- 356 8. Fisk RJ. Barriers to vaccination for coronavirus disease 2019 (COVID-19) control:  
357 experience from the United States. *Glob Health J*. 2021 Mar 1;5(1):51–5.
- 358 9. Abdul-Mutakabbir JC, Casey S, Jews V, King A, Simmons K, Hogue MD, et al. A three-  
359 tiered approach to address barriers to COVID-19 vaccine delivery in the Black community.  
360 *Lancet Glob Health*. 2021 Jun;9(6):e749–50.
- 361 10. Rutter H, Savona N, Glonti K, Bibby J, Cummins S, Finegood DT, et al. The need for a  
362 complex systems model of evidence for public health. *The Lancet*. 2017 Dec  
363 9;390(10112):2602–4.
- 364 11. Yu SWY, Hill C, Ricks ML, Bennet J, Oriol NE. The scope and impact of mobile health  
365 clinics in the United States: a literature review. *Int J Equity Health*. 2017 Oct 5;16(1):178.
- 366 12. Schwitters A, Lederer P, Zilversmit L, Gudo PS, Ramiro I, Cumba L, et al. Barriers to health  
367 care in rural Mozambique: a rapid ethnographic assessment of planned mobile health clinics  
368 for ART. *Glob Health Sci Pract*. 2015 Mar;3(1):109–16.
- 369 13. Attipoe-Dorcoo S, Delgado R, Gupta A, Bennet J, Oriol NE, Jain SH. Mobile health clinic  
370 model in the COVID-19 pandemic: lessons learned and opportunities for policy changes and  
371 innovation. *Int J Equity Health*. 2020 May 19;19(1):73.

- 372 14. Rassekh BM, Shu W, Santosham M, Burnham G, Doocy S. An evaluation of public, private,  
373 and mobile health clinic usage for children under age 5 in Aceh after the tsunami:  
374 implications for future disasters. *Health Psychol Behav Med.* 2014 Jan 1;2(1):359–78.
- 375 15. Larson R, Hussain S, Chau MM, Jones A, Vangeepuram N, Madden D, et al. The Power of  
376 Partnership: NYCEAL Collaborations With Health Agencies and Mobile Vaccination Vans.  
377 *Am J Public Health.* 2024 Jan;114(Suppl 1):S92–5.
- 378 16. Kulle AC, Schumacher S, von Bieberstein F. Mobile vaccination units substantially increase  
379 COVID-19 vaccinations: evidence from a randomized controlled trial. *J Public Health.* 2024  
380 Mar 1;46(1):151–7.
- 381 17. Levy P, McGlynn E, Hill AB, Zhang L, Korzeniewski SJ, Foster B, et al. From pandemic  
382 response to portable population health: A formative evaluation of the Detroit mobile health  
383 unit program. *PLoS ONE.* 2021 Nov 30;16(11):e0256908.
- 384 18. Zhang X, Tulloch JSP, Knott S, Allison R, Parvulescu P, Buchan IE, et al. Evaluating the  
385 impact of using mobile vaccination units to increase COVID-19 vaccination uptake in  
386 Cheshire and Merseyside, UK: a synthetic control analysis. *BMJ Open.* 2023 Oct  
387 6;13(10):e071852.
- 388 19. Serrano-Alarcón M, Mckee M, Palumbo L, Salvi C, Johansen A, Stuckler D. How to  
389 increase COVID-19 vaccination among a population with persistently suboptimal vaccine  
390 uptake? Evidence from the North Macedonia mobile vaccination and public health advice  
391 caravan. *Health Policy Amst Neth.* 2024 Jan;139:104966.
- 392 20. Alvi RA, Justason L, Liotta C, Martinez-Helfman S, Dennis K, Croker SP, et al. The Eagles  
393 Eye Mobile: assessing its ability to deliver eye care in a high-risk community. *J Pediatr  
394 Ophthalmol Strabismus.* 2015;52(2):98–105.
- 395 21. Hill C, Zurakowski D, Bennet J, Walker-White R, Osman JL, Quarles A, et al.  
396 Knowledgeable Neighbors:A Mobile Clinic Model for Disease Prevention and Screening in  
397 Underserved Communities. *Am J Public Health.* 2012 Mar;102(3):406–10.
- 398 22. Emanuel EJ, Persad G, Upshur R, Thome B, Parker M, Glickman A, et al. Fair Allocation of  
399 Scarce Medical Resources in the Time of Covid-19. *N Engl J Med.* 2020 May  
400 21;382(21):2049–55.
- 401 23. Woolf SH, Chapman DA, Lee JH. COVID-19 as the Leading Cause of Death in the United  
402 States. *JAMA [Internet].* 2020 Dec 17 [cited 2021 Mar 29]; Available from:  
403 <https://jamanetwork.com/journals/jama/fullarticle/2774465>
- 404 24. The New York Times. Coronavirus in the U.S.: Latest Map and Case Count. The New York  
405 Times [Internet]. 2020 Mar 3 [cited 2022 Feb 28]; Available from:  
406 <https://www.nytimes.com/interactive/2021/us/covid-cases.html>

- 407 25. Brown KA, Stall NM, Joh E, Allen U, Bogoch II, Buchan SA, et al. COVID-19 Vaccination  
408 Strategy for Ontario Using Age and Neighbourhood-Based Prioritization. *Sci Briefs Ont*  
409 COVID-19 Sci Advis Table. 2021 Feb 26;2(10).
- 410 26. Salmon D, Opel DJ, Dudley MZ, Brewer J, Breiman R. Reflections On Governance,  
411 Communication, And Equity: Challenges And Opportunities In COVID-19 Vaccination.  
412 *Health Aff (Millwood)*. 2021 Feb 4;40(3):419–25.
- 413 27. Bachireddy C, Dar M, Chen C. Medicaid and COVID-19 Vaccination—Translating  
414 Equitable Allocation Into Equitable Administration. *JAMA Health Forum*. 2021 Feb  
415 17;2(2):e210114.
- 416 28. Rutter H, Savona N, Glonti K, Bibby J, Cummins S, Finegood DT, et al. The need for a  
417 complex systems model of evidence for public health. *The Lancet*. 2017 Dec  
418 9;390(10112):2602–4.
- 419 29. Quinn SC, Kumar S. Health Inequalities and Infectious Disease Epidemics: A Challenge for  
420 Global Health Security. *Biosecurity Bioterrorism Biodefense Strategy Pract Sci*. 2014 Sep  
421 1;12(5):263–73.
- 422 30. Guttieres D, Sinskey AJ, Springs SL. Modeling Framework to Evaluate Vaccine Strategies  
423 against the COVID-19 Pandemic. *Systems*. 2021 Mar;9(1):4.
- 424 31. Angulo FJ, Finelli L, Swerdlow DL. Reopening Society and the Need for Real-Time  
425 Assessment of COVID-19 at the Community Level. *JAMA*. 2020;323(22):2247–8.
- 426 32. Rennert L, McMahan C, Kalbaugh CA, Yang Y, Lumsden B, Dean D, et al. Surveillance-  
427 based informative testing for detection and containment of SARS-CoV-2 outbreaks on a  
428 public university campus: an observational and modelling study. *Lancet Child Adolesc*  
429 *Health*. 2021;5(6):428–36.
- 430 33. Rennert L, Howard KA, Kickham CM, Gezer F, Coleman A, Roth P, et al. Implementation of  
431 a mobile health clinic framework for Hepatitis C virus screening and treatment: a descriptive  
432 study. *Lancet Reg Health – Am* [Internet]. 2024 Jan 1 [cited 2024 Apr 2];29. Available from:  
433 [https://www.thelancet.com/journals/lanam/article/PIIS2667-193X\(23\)00222-3/fulltext](https://www.thelancet.com/journals/lanam/article/PIIS2667-193X(23)00222-3/fulltext)
- 434 34. Rennert L, Gezer F, Jayawardena I, Howard KA, Bennett KJ, Litwin AH, et al. Mobile health  
435 clinics for distribution of vaccinations to underserved communities during health  
436 emergencies: A COVID-19 case study. *Public Health Pract*. 2024;Under Review.
- 437 35. Gezer F, Howard KA, Litwin AH, Martin NK, Rennert L. Identification of factors associated  
438 with opioid-related and hepatitis C virus-related hospitalisations at the ZIP code area level in  
439 the USA: an ecological and modelling study. *Lancet Public Health*. 2024 Jun 1;9(6):e354–64.
- 440 36. Alcendor DJ, Juarez PD, Matthews-Juarez P, Simon S, Nash C, Lewis K, et al. Meharry  
441 Medical College Mobile Vaccination Program: Implications for Increasing COVID-19  
442 Vaccine Uptake among Minority Communities in Middle Tennessee. *Vaccines*. 2022 Jan  
443 29;10(2):211.

- 444 37. Gupta PS, Mohareb AM, Valdes C, Price C, Jolliffe M, Regis C, et al. Expanding COVID-19  
445 vaccine access to underserved populations through implementation of mobile vaccination  
446 units. *Prev Med*. 2022 Oct 1;163:107226.
- 447 38. Gavin RM, Countryman M, Musco J, Ricard R, Roberts A, Lees C. Reaching Diverse  
448 Communities During a Local Public Health COVID-19 Vaccination Response Through a  
449 Mobile Clinic Compared to Mass Vaccination Sites. *J Public Health Manag Pract*. 2024  
450 Jun;30(3):411.
- 451 39. Schmitz M, Luminet O, Klein O, Morbée S, Van den Bergh O, Van Oost P, et al. Predicting  
452 vaccine uptake during COVID-19 crisis: A motivational approach. *Vaccine*. 2022 Jan  
453 21;40(2):288–97.
- 454 40. Cheong Q, Au-yeung M, Quon S, Concepcion K, Kong JD. Predictive Modeling of  
455 Vaccination Uptake in US Counties: A Machine Learning–Based Approach. *J Med Internet  
456 Res*. 2021 Nov 25;23(11):e33231.
- 457 41. Shiloh S, Peleg S, Nudelman G. Vaccination Against COVID-19: A Longitudinal Trans-  
458 Theoretical Study to Determine Factors that Predict Intentions and Behavior. *Ann Behav  
459 Med*. 2022 Apr 1;56(4):357–67.
- 460 42. Zhou X, Li Y. Forecasting the COVID-19 vaccine uptake rate: an infodemiological study in  
461 the US. *Hum Vaccines Immunother*. 2022 Jan 31;18(1):2017216.
- 462 43. Prisma Health celebrates groundbreaking of new emergency department at Prisma Health  
463 Oconee Memorial Hospital [Internet]. [cited 2024 Aug 13]. Available from:  
464 [https://prismahealth.org/patients-and-guests/news/prisma-health-celebrates-groundbreaking-  
465 of-new-emergency-department-at-prisma-health-oconee-memorial](https://prismahealth.org/patients-and-guests/news/prisma-health-celebrates-groundbreaking-of-new-emergency-department-at-prisma-health-oconee-memorial)
- 466 44. DP05: ACS DEMOGRAPHIC AND ... - Census Bureau Table [Internet]. [cited 2024 Sep 5].  
467 Available from:  
468 <https://data.census.gov/table/ACSDP5Y2021.DP05?q=acs%202021&g=040XX00US45>
- 469 45. CDC/ATSDR SVI Data and Documentation Download | Place and Health | ATSDR  
470 [Internet]. 2022 [cited 2023 Mar 7]. Available from:  
471 [https://www.atsdr.cdc.gov/placeandhealth/svi/data\\_documentation\\_download.html](https://www.atsdr.cdc.gov/placeandhealth/svi/data_documentation_download.html)
- 472 46. Flanagan BE, Gregory EW, Hallisey EJ, Heitgerd JL, Lewis B. A Social Vulnerability Index  
473 for Disaster Management. *J Homel Secur Emerg Manag* [Internet]. 2011 Jan 5 [cited 2023  
474 Mar 7];8(1). Available from: [https://www.degruyter.com/document/doi/10.2202/1547-  
475 7355.1792/html](https://www.degruyter.com/document/doi/10.2202/1547-7355.1792/html)
- 476 47. South Carolina Center for Rural and Primary Healthcare - School of Medicine Columbia |  
477 University of South Carolina [Internet]. [cited 2024 Apr 2]. Available from:  
478 [https://sc.edu/study/colleges\\_schools/medicine/centers\\_and\\_institutes\\_new/center\\_for\\_rural\\_  
479 and\\_primary\\_healthcare/index.php](https://sc.edu/study/colleges_schools/medicine/centers_and_institutes_new/center_for_rural_and_primary_healthcare/index.php)

- 480 48. COVID-19 Vaccines Providers [Internet]. [cited 2024 Jul 8]. Available from: [https://sc-](https://sc-dhec.maps.arcgis.com/apps/instant/nearby/index.html?appid=903e4c38fc4b4771b04fb492d366fa78)  
481 [dhec.maps.arcgis.com/apps/instant/nearby/index.html?appid=903e4c38fc4b4771b04fb492d3](https://sc-dhec.maps.arcgis.com/apps/instant/nearby/index.html?appid=903e4c38fc4b4771b04fb492d366fa78)  
482 [66fa78](https://sc-dhec.maps.arcgis.com/apps/instant/nearby/index.html?appid=903e4c38fc4b4771b04fb492d366fa78)
- 483 49. American Hospital Directory - Free Daily Limit [Internet]. [cited 2024 Apr 8]. Available  
484 from: [https://www.ahd.com/states/hospital\\_SC.html](https://www.ahd.com/states/hospital_SC.html)
- 485 50. Healthcare | South Carolina Revenue and Fiscal Affairs Office [Internet]. [cited 2023 Mar 7].  
486 Available from: <https://rfa.sc.gov/data-research/healthcare>
- 487 51. All South Carolinians Aged 16 and Older to be Eligible for COVID-19 Vaccine Beginning  
488 March 31, 2021 | S.C. Governor Henry McMaster [Internet]. [cited 2024 Jul 8]. Available  
489 from: [https://governor.sc.gov/news/2021-03/all-south-carolinians-aged-16-and-older-be-](https://governor.sc.gov/news/2021-03/all-south-carolinians-aged-16-and-older-be-eligible-covid-19-vaccine-beginning-march)  
490 [eligible-covid-19-vaccine-beginning-march](https://governor.sc.gov/news/2021-03/all-south-carolinians-aged-16-and-older-be-eligible-covid-19-vaccine-beginning-march)
- 491 52. AJMC [Internet]. 2021 [cited 2023 Sep 5]. A Timeline of COVID-19 Vaccine Developments  
492 in 2021. Available from: [https://www.ajmc.com/view/a-timeline-of-covid-19-vaccine-](https://www.ajmc.com/view/a-timeline-of-covid-19-vaccine-developments-in-2021)  
493 [developments-in-2021](https://www.ajmc.com/view/a-timeline-of-covid-19-vaccine-developments-in-2021)
- 494



## Appendix

### Model description

#### Negative binomial generalized linear mixed effects model:

$$\log(\mu_{ij}) = \mathbf{X}_{ij}^T \beta + b_j + c_{ij}$$

The model assumes the following conditions:

$Y_{ij}$ : Number of individuals utilized the mobile health clinic (MHC) at i-th site visit in the j-th census tract. The outcome variable  $Y_{ij}$  follows the negative binomial distribution

$Y_{ij} \sim \text{NegBin}(\mu_{ij}, \theta)$  where  $\mu_{ij}$  is the mean of the negative binomial distribution at i-th site visit in the j-th census tract and  $\theta$  is the dispersion parameter.

$\mathbf{X}_{ij}^T$ : Vector of fixed effects for the i-th site visit in the j-th census tract. Fixed effects included the census tract population, visit term (term 1: before March 31, 2021, and after March 31, 2021), site category (food banks, schools, universities, corporate, homeless shelters, and other), time of the week (Monday to Thursday, Friday, and weekend), time of the week (morning, afternoon, and evening), visit number (first, second, and third or more), and the duration of the visit. The number of vaccination centers and hospitals close to the MHC location is added to the model separately to avoid collinearity between these variables. The visit time changed to (term 1: before May 10, 2021, and after May 10, 2021) for the sensitivity analysis.

$b_j$ : Random effect for the j-th census tract with  $b_j \sim N(0, \sigma_b^2)$

$c_{ij}$ : Random effect for the i-th site in the j-th census tract  $c_{ij} \sim N(0, \sigma_b^2)$

#### Ordinal logistic regression model

Let Y be the ordered categorical outcome of number of individuals utilized the MHC in a census tract {1: 10-19, 2: 20-49, 3: 50-99, 4: 100-249, 5: 250-399, and 6: more than 400 individuals}.

Ordinal logistic regression calculates the logged odds of being equal or less than a specific category k of the outcome variable. The cumulative logit model (proportional odds model) can be expressed as:

$$\log \frac{P(Y_i \leq k | X_i)}{1 - P(Y_i \leq k | X_i)} = \alpha_k - \mathbf{X}_i^T \beta$$

$Y_i$ : The ordered categorical outcome {1: 10-19, 2: 20-49, 3: 50-99, 4: 100-249, 5: 250-399, and 6: more than 400 individuals} of MHC for i-th census tract.

$\mathbf{X}_i^T$ : The vector of fixed effects for the  $i$ -th census tract. These effects include vaccination term, number of visits conducted to the census tract, census tract level population, proportion of individuals within 30-44, 45-64, and 65+ years of ages, proportion of males, non-White, unemployed, labor force participation, uninsured, under poverty, social vulnerability index (SVI), median income, primary care physicians per 1,000 people, all-cause mortality rate, hospital presence, and percent of rural areas. Variables that are available for zip codes are transformed to census tract level by weighting on the population of a census tract living in different zip codes.

Finally,  $\alpha_k$  are the threshold parameters (cut-points) separating the adjacent categories of the ordinal response.

**Table S1:** Characteristics of census tracts that are projected to have high (group: 50-99) and low (groups: 0-19 and 20-49) MHC utilization for COVID-19 vaccination after April 1, 2021. Median values with IQR and p-values for significance of the difference of medians are provided.

|                           | <b>High Utilization</b><br><b>N = 181</b> | <b>Low Utilization</b><br><b>N = 1,115</b> | <b>P-value</b>   |
|---------------------------|-------------------------------------------|--------------------------------------------|------------------|
| % Age under 18            | 21.3 (17.7-25.3)                          | 21.6 (18.0-25.0)                           | 0.480            |
| % Age 18-29               | 13.4 (10.5-16.0)                          | 14.5 (11.4-18.1)                           | <b>0.002</b>     |
| % Age 30-44               | 19.3 (15.9-22.6)                          | 17.7 (14.7-20.9)                           | <b>&lt;0.001</b> |
| % Age 45-64               | 27.3 (23.6-30.6)                          | 26.3 (22.5-29.7)                           | <b>0.006</b>     |
| % Age over 65             | 16.0 (12.7-21.2)                          | 17.7 (14.1-22.0)                           | <b>&lt;0.001</b> |
| % Male                    | 48.5 (46.1-50.8)                          | 48.5 (45.9-51.4)                           | 0.862            |
| % Non-white               | 35.1 (23.0-54.4)                          | 34.8 (18.9-54.3)                           | 0.949            |
| % Hispanic                | 5.7 (3.6-8.3)                             | 4.5 (2.6-7.4)                              | <b>&lt;0.001</b> |
| SVI                       | 0.29 (0.14-0.53)                          | 0.57 (0.32-0.80)                           | <b>&lt;0.001</b> |
| Income ( $\times$ \$1000) | 69.8 (55.7-90.1)                          | 50.5 (39.3-63.2)                           | <b>&lt;0.001</b> |
| % Unemployed              | 4.3 (2.2-6.6)                             | 4.8 (2.7-8.0)                              | <b>&lt;0.001</b> |
| PCP rate                  | 0.2 (0.0-0.6)                             | 0.4 (0.1-0.9)                              | <b>&lt;0.001</b> |
| Hospitals                 | 0.0 (0.0-0.2)                             | 0.1 (0.0-1.0)                              | <b>&lt;0.001</b> |
| % Uninsured               | 9.2 (7.0-11.6)                            | 11.0 (9.0-12.5)                            | <b>&lt;0.001</b> |
| Mortality rate            | 42.3 (33.6-50.1)                          | 54.0 (44.6-63.2)                           | <b>&lt;0.001</b> |
| % in Poverty              | 7.7 (4.8-11.2)                            | 12.6 (8.8-16.6)                            | <b>&lt;0.001</b> |
| % in Rural                | 10.6 (1.8-44.7)                           | 34.1 (6.8-64.4)                            | <b>&lt;0.001</b> |
| Hospitalizations          | 1,271 (796-2,014)                         | 1,106 (640-1,980)                          | 0.072            |
| Dead                      | 57 (32-92)                                | 64 (33-100)                                | <b>0.050</b>     |

It is made available under a [CC-BY 4.0 International license](https://creativecommons.org/licenses/by/4.0/).

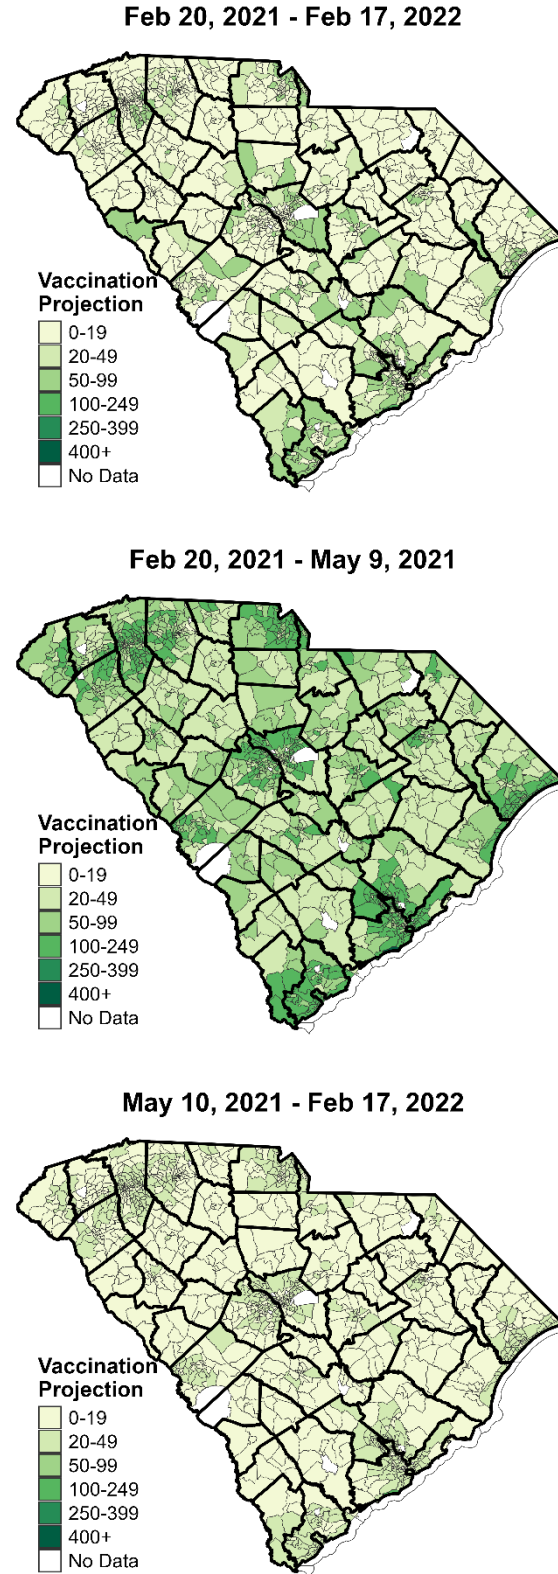

**Figure S1:** Projected MHC utilization for COVID-19 vaccination at census tracts at different time periods (12-months, and pre and post May 10, 2021).

**Table S2:** Results for prediction accuracy. Number of census tracts that have the same and deviated observed and predicted category for 12-month predictions, and term-based predictions (term 1: before May 9, 2021, term 2: after May 10, 2021).

| <b>Predicted Category</b>        | <b>12-Month Predictions</b> | <b>Term-based Predictions</b> |
|----------------------------------|-----------------------------|-------------------------------|
|                                  | <b>N (%)</b>                | <b>N (%)</b>                  |
| 5 groups higher than truth       | -                           | 18 (0.1)                      |
| 4 groups higher than truth       | 4 (0.0)                     | 11 (0.0)                      |
| 3 groups higher than truth       | 286 (1.1)                   | 409 (1.6)                     |
| 2 groups higher than truth       | 2,678 (10.7)                | 1,841 (7.4)                   |
| <b>1 group higher than truth</b> | <b>5,110 (20.4)</b>         | <b>5,898 (23.6)</b>           |
| <b>Exact group</b>               | <b>7,158 (28.6)</b>         | <b>6,539 (26.2)</b>           |
| <b>1 group lower than truth</b>  | <b>4,869 (19.5)</b>         | <b>5,495 (22.0)</b>           |
| 2 group lower than truth         | 3,069 (12.3)                | 3362 (13.4)                   |
| 3 group lower than truth         | 1,402 (5.6)                 | 1,213 (4.9)                   |
| 4 group lower than truth         | 365 (1.5)                   | 214 (0.9)                     |
| 5 group lower than truth         | 47 (0.2)                    | -                             |

**Table S3:** Number of census tracts (N) for each category of the projected MHC utilization. Projections are made for an MHC visit at any time during 12-month period (February 20, 2021, to February 17, 2022), before May 9, 2021, and after May 10, 2021.

| <b>Grouping</b> | <b>12-Month</b>      | <b>Before</b>        | <b>After</b>         |
|-----------------|----------------------|----------------------|----------------------|
|                 | <b>N = 1,296 (%)</b> | <b>May 9</b>         | <b>May 10</b>        |
|                 |                      | <b>N = 1,296 (%)</b> | <b>N = 1,296 (%)</b> |
| 0-19            | 914 (70.5)           | 5 (0.4)              | 753 (58.1)           |
| 20-49           | 187 (14.4)           | 388 (29.9)           | 540 (41.7)           |
| 50-99           | 192 (14.8)           | 455 (35.1)           | 2 (0.2)              |
| 100-249         | 2 (0.2)              | 447 (34.5)           | 1 (0.1)              |
| 250-399         | 1 (0.1)              | -                    | -                    |
| 400+            | -                    | 1 (0.1)              | -                    |

**Table S4:** Characteristics of census tracts that are projected to have high (groups: 50-99, 100-249, and 400+) and low (groups: 0-19 and 20-49) MHC utilization for COVID-19 vaccination before May 9, 2021. Median values with IQR and p-values for significance of the difference of medians are provided.

|                    | <b>High Utilization<br/>N = 903</b> | <b>Low Utilization<br/>N = 393</b> | <b>P-value</b>   |
|--------------------|-------------------------------------|------------------------------------|------------------|
| % Age under 18     | 21.0 (17.5-24.6)                    | 22.7 (18.8-26.1)                   | <b>&lt;0.001</b> |
| % Age 18-29        | 13.9 (10.7-17.7)                    | 14.8 (12.3-18.1)                   | <b>0.007</b>     |
| % Age 30-44        | 18.5 (15.2-21.8)                    | 17.5 (14.2-20.9)                   | <b>0.009</b>     |
| % Age 45-64        | 27.1 (23.6-30.5)                    | 25.1 (21.0-28.6)                   | <b>&lt;0.001</b> |
| % Age over 65      | 17.1 (13.2-22.0)                    | 17.9 (14.2-21.7)                   | 0.122            |
| % Male             | 48.9 (46.6-51.6)                    | 47.4 (44.6-50.4)                   | <b>&lt;0.001</b> |
| % Non-white        | 31.5 (18.0-51.0)                    | 39.8 (25.3-59.1)                   | <b>&lt;0.001</b> |
| % Hispanic         | 5.4 (3.4-8.5)                       | 3.1 (2.0-5.8)                      | <b>&lt;0.001</b> |
| SVI                | 0.4 (0.2-0.7)                       | 0.6 (0.4-0.8)                      | <b>&lt;0.001</b> |
| Income (×\$1000)   | 61.2 (47.8-78.9)                    | 43.1 (34.8-53.7)                   | <b>&lt;0.001</b> |
| % Unemployed       | 4.5 (2.3-7.0)                       | 5.1 (3.1-8.4)                      | <b>&lt;0.001</b> |
| PCP rate           | 0.3 (0.0-0.7)                       | 0.5 (0.1-1.5)                      | <b>&lt;0.001</b> |
| Hospitals          | 0.0 (0.0-1.0)                       | 0.2 (0.0-1.0)                      | <b>0.001</b>     |
| % Uninsured        | 10.7 (8.3-12.6)                     | 10.7 (9.0-11.8)                    | 0.727            |
| Mortality rate     | 48.0 (38.6-56.8)                    | 58.7 (49.6-66.1)                   | <b>&lt;0.001</b> |
| % in Poverty       | 10.1 (6.1-14.5)                     | 14.4 (10.6-18.4)                   | <b>&lt;0.001</b> |
| % in Rural         | 14.9 (2.4-45.7)                     | 59.7 (33.2-92.5)                   | <b>&lt;0.001</b> |
| COVID-19 ED visits | 1,339 (796-2,091)                   | 843 (430-1,432)                    | <b>&lt;0.001</b> |
| COVID-19 deaths    | 67 (40-104)                         | 46 (22-76)                         | <b>&lt;0.001</b> |

**Table S5:** Characteristics of census tracts that are projected to have high (groups: 20-49, 50-99, and 100-249) and low (group: 0-19) MHC utilization for COVID-19 vaccination after May 10,

2021. Median values with IQR and p-values for significance of the difference of medians are provided.

|                    | <b>High Utilization<br/>N = 543</b> | <b>Low Utilization<br/>N = 753</b> | <b>P-value</b>   |
|--------------------|-------------------------------------|------------------------------------|------------------|
| % Age under 18     | 20.8 (17.4-24.4)                    | 22.0 (18.1-25.5)                   | <b>0.001</b>     |
| % Age 18-29        | 13.2 (10.0-16.8)                    | 14.8 (12.2-18.5)                   | <b>&lt;0.001</b> |
| % Age 30-44        | 18.5 (15.1-21.8)                    | 18.0 (14.8-21.2)                   | 0.132            |
| % Age 45-64        | 27.7 (24.5-31.2)                    | 25.7 (21.8-29.1)                   | <b>&lt;0.001</b> |
| % Age over 65      | 16.7 (13.0-22.4)                    | 17.7 (14.0-21.7)                   | <b>0.013</b>     |
| % Male             | 49.0 (47.0-51.5)                    | 48.1 (45.0-51.0)                   | <b>&lt;0.001</b> |
| % Non-white        | 28.4 (16.1-46.4)                    | 39.3 (23.9-58.4)                   | <b>&lt;0.001</b> |
| % Hispanic         | 5.9 (3.8-9.4)                       | 4.0 (2.3-6.7)                      | <b>&lt;0.001</b> |
| SVI                | 0.3 (0.1-0.6)                       | 0.6 (0.4-0.8)                      | <b>&lt;0.001</b> |
| Income (×\$1000)   | 68.6 (55.9-88.0)                    | 46.6 (37.1-56.9)                   | <b>&lt;0.001</b> |
| % Unemployed       | 4.1 (2.2-6.2)                       | 5.2 (3.0-8.3)                      | <b>&lt;0.001</b> |
| PCP rate           | 0.2 (0.0-0.6)                       | 0.4 (0.1-1.1)                      | <b>&lt;0.001</b> |
| Hospitals          | 0.0 (0.0-1.0)                       | 0.1 (0.0-1.0)                      | <b>&lt;0.001</b> |
| % Uninsured        | 10.4 (7.9-12.6)                     | 10.8 (9.0-12.1)                    | 0.063            |
| Mortality rate     | 43.7 (36.0-53.0)                    | 56.0 (47.4-64.2)                   | <b>&lt;0.001</b> |
| % in Poverty       | 8.2 (5.3-12.1)                      | 13.5 (9.7-17.3)                    | <b>&lt;0.001</b> |
| % in Rural         | 7.6 (1.4-28.1)                      | 51.2 (17.8-82.6)                   | <b>&lt;0.001</b> |
| COVID-19 ED visits | 1,478 (904-2,349)                   | 953 (515-1,635)                    | <b>&lt;0.001</b> |
| COVID-19 deaths    | 69 (43-104)                         | 56 (26-90)                         | <b>&lt;0.001</b> |

**Table S6:** Characteristics of census tracts that are projected to have high (groups: 20-49, 50-99, 100-249, and 250-399) and low (group: 0-19) MHC utilization for COVID-19 vaccination any time during 12-month period. Median values with IQR and p-values for significance of the difference of medians are provided.

|                    | <b>High Utilization<br/>N = 382</b> | <b>Low Utilization<br/>N = 914</b> | <b>P-value</b>   |
|--------------------|-------------------------------------|------------------------------------|------------------|
| % Age under 18     | 21.3 (17.3-25.5)                    | 21.6 (18.1-24.9)                   | 0.472            |
| % Age 18-29        | 13.1 (9.9-16.0)                     | 14.6 (11.9-18.4)                   | <b>&lt;0.001</b> |
| % Age 30-44        | 18.9 (14.9-22.4)                    | 17.9 (14.9-21.0)                   | <b>0.008</b>     |
| % Age 45-64        | 26.8 (23.1-30.1)                    | 26.4 (22.7-29.8)                   | 0.267            |
| % Age over 65      | 17.3 (13.3-22.9)                    | 17.3 (13.5-21.4)                   | 0.894            |
| % Male             | 48.7 (46.3-51.2)                    | 48.4 (45.8-51.2)                   | 0.190            |
| % Non-white        | 35.7 (22.2-57.4)                    | 34.6 (19.6-52.0)                   | 0.587            |
| % Hispanic         | 5.2 (3.1-8.1)                       | 4.6 (2.7-7.5)                      | <b>0.043</b>     |
| SVI                | 0.4 (0.1-0.7)                       | 0.6 (0.3-0.8)                      | <b>&lt;0.001</b> |
| Income (×\$1000)   | 69.6 (53.2-91.3)                    | 50.4 (39.2-62.6)                   | <b>&lt;0.001</b> |
| % Unemployed       | 4.5 (2.3-7.1)                       | 4.7 (2.7-7.6)                      | <b>&lt;0.001</b> |
| PCP rate           | 0.2 (0.0-0.6)                       | 0.4 (0.1-1.0)                      | <b>&lt;0.001</b> |
| Hospitals          | 0.0 (0.0-0.4)                       | 0.2 (0.0-1.0)                      | <b>&lt;0.001</b> |
| % Uninsured        | 9.6 (7.3-12.0)                      | 10.9 (9.0-12.4)                    | <b>&lt;0.001</b> |
| Mortality rate     | 44.6 (35.3-53.9)                    | 53.6 (44.6-62.6)                   | <b>&lt;0.001</b> |
| % in Poverty       | 8.1 (4.8-11.8)                      | 12.7 (9.2-16.5)                    | <b>&lt;0.001</b> |
| % in Rural         | 15.0 (1.8-49.3)                     | 34.0 (6.9-64.3)                    | <b>&lt;0.001</b> |
| COVID-19 ED visits | 1,155 (627-1,999)                   | 1,151 (661-2,005)                  | 0.951            |
| COVID-19 deaths    | 54 (29-87)                          | 66 (36-101)                        | <b>&lt;0.001</b> |
